# Supplementary material for: BIM Use by Architecture, Engineering, and Construction (AEC) Industry in Educational Facility Projects
Source: Hindawi journal article supplement (doi:10.1155/2019/1392684), 2019-01-01
Supplement: f1 [file 1392684.f1.pdf]

## APPENDIX A

**\*1. Do you consent to participate in this survey ?**

☐ Yes

☐ No

# BIM for the Design and Construction of Educational Facilities

## Instructions

The answers to this survey should solely be based on your experience with the design and construction of educational facilities and your company's experience using building information modeling (BIM)

## Demographics

**\*2. Which of the choices below best represents your role in the design and construction process?**

**(Select only one.)**

- ☐ Owner
- ☐ Architect
- ☐ Civil engineer
- ☐ Structural engineer
- ☐ MEP engineer
- ☐ Contractor
- ☐ Subcontractor
- ☐ Manufacturer
- ☐ Property developer
- ☐ Facilities manager
- ☐ Interior designer
- ☐ Other (please specify)

**\*3. What types of educational projects does your company execute?**

**(Select all that apply)**

- ☐ Higher education (universities)
- ☐ Private schools
- ☐ Public schools
- ☐ Primary schools (elementary and middle schools)
- ☐ Secondary schools (high schools)
- ☐ None
- ☐ Other (please specify)

**\*4. What is the primary project delivery method your company uses for educational projects?**

- ☐ Design-bid-build
- ☐ Design-build
- ☐ Early contractor involvement/early assisted design
- ☐ Negotiated contract
- ☐ Design-build-finance-operate
- ☐ Integrated project delivery
- ☐ Construction management
- ☐ Construction management at risk
- ☐ Other (please specify)

**\*5. What is your company's annual revenue?**

\$

**\*6. How many employees does your company have?**

Employees

**\*7. In what city is your company primarily located?**

City

State

**\*8. How many years have you been in the profession?**

Years

## Company's current use of BIM

### \*9. Does your company use BIM?

☐ Yes

☐ No

## No use of BIM

**\*10. Which of the following best describes your company's lack of direct involvement with BIM?**

- ☐ My company does not use BIM but would like to implement BIM
- ☐ My company has used BIM in the past but no longer uses it
- ☐ My company outsources BIM
- ☐ My company has no interest in using BIM
- ☐ I have never heard of BIM

# BIM for the Design and Construction of Educational Facilities

## BIM Implementation at the Management Level

### \*11. How long has your firm been using BIM in its practice?

Years

### \*12. What is the current business value of using BIM for your company?

- ☐ We have optimized the value of BIM in our current use
- ☐ We are just starting to see the potential value of using BIM
- ☐ We are getting no meaningful value from BIM

### \*13. What is driving the use of BIM in your company on educational facilities projects?

(Select all that apply)

- ☐ Clients
- ☐ Subcontractors
- ☐ Management
- ☐ Manufacturers/fabricators
- ☐ Government permitting agencies
- ☐ Competition from other companies using BIM
- ☐ Vendors
- ☐ Other (please specify)

### \*14. Rank the importance of the following roles in developing the project building information model during the design and construction processes. (4 - Most Important to 1- Least Important. Please use a ranking only once.)

Architect

Engineer

Contractor

Owner

## BIM for the Design and Construction of Educational Facilities

**\*15. In your opinion, who can benefit from BIM use on educational facilities projects?  
(Select all that apply)**

- ☐ Owner
- ☐ Architect
- ☐ Engineer
- ☐ Contractor
- ☐ Subcontractor
- ☐ Manufacturer
- ☐ Facilities manager
- ☐ Project developer
- ☐ Public agencies
- ☐ Other (please specify)

**\*16. Who does your company primarily share BIM information with when working on the design and construction of educational facilities projects?**

- ☐ Owner
- ☐ Architect
- ☐ Engineer
- ☐ Contractor
- ☐ Subcontractor
- ☐ Manufacturer
- ☐ Other (please specify)



# BIM for the Design and Construction of Educational Facilities

**\*17. What kind of documents has your company included in the building information model of educational facilities for the owner?**

**(Select all that apply)**

- ☐ Maintenance manuals and warranties
- ☐ Cost data
- ☐ Operation manuals
- ☐ Shop drawings
- ☐ Specifications
- ☐ Evaluations of building performance
- ☐ Other (please specify)

**\*18. Which disputes has your company encountered when implementing BIM on educational facilities projects? (Select all that apply.)**

- ☐ My company has not encountered disputes with BIM implementation
- ☐ Intellectual property ownership of the model or parts thereof
- ☐ Disputes regarding liability for system designs
- ☐ Other (please specify)

**\*19. How many employees in your company have experience with using BIM?**

Employees

**\*20. How does your company encourage the use of BIM?**

- ☐ It does not encourage the use of BIM
- ☐ It provides training
- ☐ It requires it
- ☐ It compensates employees for their continuing education
- ☐ Other (please specify)

## \*21. What is the best way to acquire BIM expertise for the company?

- ☐ Hire new BIM skilled professionals
- ☐ Online seminar
- ☐ Internal training
- ☐ Outside training
- ☐ Other (please specify)

## \*22. Does your company use a BIM Implementation guide?

Yes - Which guide?

No - Would you be interested in using one?

## BIM Implementation at the Project Execution Level

### **\*23. What BIM software does your company use?**

**(Select all that apply)**

- ☐ Revit Architecture
- ☐ Revit Structure
- ☐ Revit MEP
- ☐ Bentley
- ☐ Bentley Facilities
- ☐ ArchiCAD
- ☐ Digital Project
- ☐ Tekla Structures
- ☐ Nemetschek Allplan Architecture
- ☐ IntelliCAD
- ☐ CADSoft Envisioneer
- ☐ Ecotect
- ☐ VICO Constructor
- ☐ Navisworks
- ☐ Gehry Technologies Digital Project
- ☐ Beck-Technology dProfiler
- ☐ Other (please specify)

### **\*24. On what percentage of educational facilities projects completed by your company has some form of BIM software been utilized over the last 5 years?**

%

## 25. On what percentage of education facilities projects has your company used the following BIM applications over the last 5 years?

|                                                                 |                      |
|-----------------------------------------------------------------|----------------------|
| Geographic Information Systems (GIS) and site specific analysis | <input type="text"/> |
| Space planning and validation                                   | <input type="text"/> |
| 3D visualizations                                               | <input type="text"/> |
| Structural analysis                                             | <input type="text"/> |
| MEP analysis                                                    | <input type="text"/> |
| Sustainability analysis (LEED)                                  | <input type="text"/> |
| Automation of documentation                                     | <input type="text"/> |
| Automated checking of code compliance                           | <input type="text"/> |
| Clash detection and collision assessment                        | <input type="text"/> |
| 4D scheduling and simulation of construction activities         | <input type="text"/> |
| 5D quantity take-off and cost estimate                          | <input type="text"/> |
| 6D facilities management and maintenance                        | <input type="text"/> |
| Building performance analysis (Energy consumption calculations) | <input type="text"/> |
| Lifecycle analysis                                              | <input type="text"/> |

## General opinions on BIM

**\*26. In your opinion what is the importance of using BIM on educational facilities projects today?**

- ☐ Very important
- ☐ Important
- ☐ Slightly Important
- ☐ Not important

**\*27. In your opinion what will be the importance of using BIM on educational facilities projects by 2020?**

- ☐ Very important
- ☐ Important
- ☐ Slightly Important
- ☐ Not important

**\*28. Which project delivery method provides the best environment for using BIM on educational facilities projects?**

- ☐ Design-bid-build
- ☐ Design-build
- ☐ Early contractor involvement/early assisted design
- ☐ Negotiated contract
- ☐ Design-build-finance-operate
- ☐ Integrated project delivery
- ☐ Construction management
- ☐ Construction management at risk
- ☐ Other (please specify)

**\*29. In what phase of design and construction is BIM use valuable?**

**(Select all that apply.)**

- ☐ Pre-design
- ☐ Schematic design
- ☐ Design development
- ☐ Construction documents
- ☐ Bidding process
- ☐ Pre-construction
- ☐ Construction administration phase
- ☐ Fabrication
- ☐ Closeout/commissioning
- ☐ Operations and maintenance
- ☐ Other (please specify)

# BIM for the Design and Construction of Educational Facilities

## BIM Applications

**\*30. Rate the importance of using the following features of BIM software in order to enhance the quality of educational facilities projects.**

|                                                                 | Not Important         | Slightly Important    | Neither Important nor Not Important | Important             | Very Important        |
|-----------------------------------------------------------------|-----------------------|-----------------------|-------------------------------------|-----------------------|-----------------------|
| Geographic Information Systems (GIS) and site specific analysis | <input type="radio"/> | <input type="radio"/> | <input type="radio"/>               | <input type="radio"/> | <input type="radio"/> |
| Space planning and validation                                   | <input type="radio"/> | <input type="radio"/> | <input type="radio"/>               | <input type="radio"/> | <input type="radio"/> |
| 3D visualizations                                               | <input type="radio"/> | <input type="radio"/> | <input type="radio"/>               | <input type="radio"/> | <input type="radio"/> |
| Structural analysis                                             | <input type="radio"/> | <input type="radio"/> | <input type="radio"/>               | <input type="radio"/> | <input type="radio"/> |
| MEP analysis                                                    | <input type="radio"/> | <input type="radio"/> | <input type="radio"/>               | <input type="radio"/> | <input type="radio"/> |
| Sustainability analysis (LEED)                                  | <input type="radio"/> | <input type="radio"/> | <input type="radio"/>               | <input type="radio"/> | <input type="radio"/> |
| Automation of documentation                                     | <input type="radio"/> | <input type="radio"/> | <input type="radio"/>               | <input type="radio"/> | <input type="radio"/> |
| Automated checking of code compliance                           | <input type="radio"/> | <input type="radio"/> | <input type="radio"/>               | <input type="radio"/> | <input type="radio"/> |
| Clash detection and collision assessment                        | <input type="radio"/> | <input type="radio"/> | <input type="radio"/>               | <input type="radio"/> | <input type="radio"/> |
| 4D scheduling and simulation of construction activities         | <input type="radio"/> | <input type="radio"/> | <input type="radio"/>               | <input type="radio"/> | <input type="radio"/> |
| 5D quantity take-off and cost estimate                          | <input type="radio"/> | <input type="radio"/> | <input type="radio"/>               | <input type="radio"/> | <input type="radio"/> |
| 6D facilities management and maintenance                        | <input type="radio"/> | <input type="radio"/> | <input type="radio"/>               | <input type="radio"/> | <input type="radio"/> |
| Building performance analysis (Energy consumption calculations) | <input type="radio"/> | <input type="radio"/> | <input type="radio"/>               | <input type="radio"/> | <input type="radio"/> |
| Lifecycle analysis                                              | <input type="radio"/> | <input type="radio"/> | <input type="radio"/>               | <input type="radio"/> | <input type="radio"/> |

# BIM for the Design and Construction of Educational Facilities

## BIM Benefits

**\*31. Rate your level of agreement with the following benefits of BIM for the design and construction of educational facilities.**

|                                                                                                                                                  | Strongly Disagree     | Disagree              | Neither Agree nor Disagree | Agree                 | Strongly Agree        |
|--------------------------------------------------------------------------------------------------------------------------------------------------|-----------------------|-----------------------|----------------------------|-----------------------|-----------------------|
| Serves as a new marketing tool for firms                                                                                                         | <input type="radio"/> | <input type="radio"/> | <input type="radio"/>      | <input type="radio"/> | <input type="radio"/> |
| Increases client engagement and provides clearer understanding of 3D visualizations                                                              | <input type="radio"/> | <input type="radio"/> | <input type="radio"/>      | <input type="radio"/> | <input type="radio"/> |
| Allows for long term data assessment                                                                                                             | <input type="radio"/> | <input type="radio"/> | <input type="radio"/>      | <input type="radio"/> | <input type="radio"/> |
| Lowers risk and better predicts outcomes due to discovery of errors, omissions and conflicts prior to construction                               | <input type="radio"/> | <input type="radio"/> | <input type="radio"/>      | <input type="radio"/> | <input type="radio"/> |
| Reduces RFI's, change orders, claims, disputes and conflicts                                                                                     | <input type="radio"/> | <input type="radio"/> | <input type="radio"/>      | <input type="radio"/> | <input type="radio"/> |
| Improves collaboration and communication between disciplines due to more reliable and direct data exchange from a single resource of information | <input type="radio"/> | <input type="radio"/> | <input type="radio"/>      | <input type="radio"/> | <input type="radio"/> |
| Encourages the use of other technologies (GIS, Unity, etc.)                                                                                      | <input type="radio"/> | <input type="radio"/> | <input type="radio"/>      | <input type="radio"/> | <input type="radio"/> |
| Encourages consideration for sustainable building systems that conserve energy                                                                   | <input type="radio"/> | <input type="radio"/> | <input type="radio"/>      | <input type="radio"/> | <input type="radio"/> |
| Evaluates the impact of different design solutions                                                                                               | <input type="radio"/> | <input type="radio"/> | <input type="radio"/>      | <input type="radio"/> | <input type="radio"/> |
| Facilitates modular construction                                                                                                                 | <input type="radio"/> | <input type="radio"/> | <input type="radio"/>      | <input type="radio"/> | <input type="radio"/> |
| Increases prefabrication                                                                                                                         | <input type="radio"/> | <input type="radio"/> | <input type="radio"/>      | <input type="radio"/> | <input type="radio"/> |
| Reduces on-site waste and materials use                                                                                                          | <input type="radio"/> | <input type="radio"/> | <input type="radio"/>      | <input type="radio"/> | <input type="radio"/> |
| Reduces project delivery time                                                                                                                    | <input type="radio"/> | <input type="radio"/> | <input type="radio"/>      | <input type="radio"/> | <input type="radio"/> |
| Enables faster reviews for approval and permits                                                                                                  | <input type="radio"/> | <input type="radio"/> | <input type="radio"/>      | <input type="radio"/> | <input type="radio"/> |
| Reduces construction and production costs                                                                                                        | <input type="radio"/> | <input type="radio"/> | <input type="radio"/>      | <input type="radio"/> | <input type="radio"/> |
| Enables automation of documentation (better accuracy and accounts for adjustments and changes automatically)                                     | <input type="radio"/> | <input type="radio"/> | <input type="radio"/>      | <input type="radio"/> | <input type="radio"/> |
| Allows more time to be spent on design than on contract documentation                                                                            | <input type="radio"/> | <input type="radio"/> | <input type="radio"/>      | <input type="radio"/> | <input type="radio"/> |
| Improves construction safety                                                                                                                     | <input type="radio"/> | <input type="radio"/> | <input type="radio"/>      | <input type="radio"/> | <input type="radio"/> |
| Increases project profitability                                                                                                                  | <input type="radio"/> | <input type="radio"/> | <input type="radio"/>      | <input type="radio"/> | <input type="radio"/> |
| Increases productivity and efficiency                                                                                                            | <input type="radio"/> | <input type="radio"/> | <input type="radio"/>      | <input type="radio"/> | <input type="radio"/> |
| Provides more accurate as-built deliverables                                                                                                     | <input type="radio"/> | <input type="radio"/> | <input type="radio"/>      | <input type="radio"/> | <input type="radio"/> |



## BIM Obstacles

### 32. How likely is it that the following obstacles would prevent BIM use for the design and construction of educational facilities?

|                                                                                                     | Not Likely At All     | Somewhat Likely       | Moderately Likely     | Very Likely           | Extremely Likely      |
|-----------------------------------------------------------------------------------------------------|-----------------------|-----------------------|-----------------------|-----------------------|-----------------------|
| Cost of software and new hardware to keep up with software                                          | <input type="radio"/> |
| Cost of hiring experienced staff                                                                    | <input type="radio"/> |
| Lack of expertise and need for training                                                             | <input type="radio"/> |
| Unclear responsibilities, assigned roles and BIM deliverables                                       | <input type="radio"/> |
| Disruption in workflow to implement new BIM process                                                 | <input type="radio"/> |
| Vulnerability or security of file sharing                                                           | <input type="radio"/> |
| Legal liabilities of the BIM process                                                                | <input type="radio"/> |
| Lack of precedence, established laws and regulations about BIM use                                  | <input type="radio"/> |
| Not enough owner demand                                                                             | <input type="radio"/> |
| Fast-paced and small sized projects do not justify the time needed for and cost of implementing BIM | <input type="radio"/> |
| Lack of substantial quantifiable benefits and evaluation methods                                    | <input type="radio"/> |
| Lack of BIM use standards                                                                           | <input type="radio"/> |
| Lack of software interoperability                                                                   | <input type="radio"/> |

# BIM for the Design and Construction of Educational Facilities

## BIM Procedures

**\*33. In your opinion, how important is it to include each of the following procedures in a BIM guide for the design and construction of educational facilities?**

|                                                                                                                                          | Not Important         | Slightly Important    | Neither Important nor Not Important | Important             | Very Important        |
|------------------------------------------------------------------------------------------------------------------------------------------|-----------------------|-----------------------|-------------------------------------|-----------------------|-----------------------|
| Developing a BIM adoption plan (assigning responsibilities, organization and workflow of all participants)                               | <input type="radio"/> | <input type="radio"/> | <input type="radio"/>               | <input type="radio"/> | <input type="radio"/> |
| Establishing short-term and long-term goals for BIM adoption                                                                             | <input type="radio"/> | <input type="radio"/> | <input type="radio"/>               | <input type="radio"/> | <input type="radio"/> |
| Transitioning from CAD-based to BIM-based delivery approach                                                                              | <input type="radio"/> | <input type="radio"/> | <input type="radio"/>               | <input type="radio"/> | <input type="radio"/> |
| Selecting contract specifications using BIM and determining BIM based project deliverables (handover model, specifications and as built) | <input type="radio"/> | <input type="radio"/> | <input type="radio"/>               | <input type="radio"/> | <input type="radio"/> |
| Selecting BIM software and appropriate BIM applications                                                                                  | <input type="radio"/> | <input type="radio"/> | <input type="radio"/>               | <input type="radio"/> | <input type="radio"/> |
| Setting standards for using BIM, model production and creation, standards for sharing and documentation                                  | <input type="radio"/> | <input type="radio"/> | <input type="radio"/>               | <input type="radio"/> | <input type="radio"/> |
| Using BIM for design                                                                                                                     | <input type="radio"/> | <input type="radio"/> | <input type="radio"/>               | <input type="radio"/> | <input type="radio"/> |
| Using BIM for constructability reviews                                                                                                   | <input type="radio"/> | <input type="radio"/> | <input type="radio"/>               | <input type="radio"/> | <input type="radio"/> |
| Measuring building performance using BIM                                                                                                 | <input type="radio"/> | <input type="radio"/> | <input type="radio"/>               | <input type="radio"/> | <input type="radio"/> |
| Measuring and evaluating benefits of BIM                                                                                                 | <input type="radio"/> | <input type="radio"/> | <input type="radio"/>               | <input type="radio"/> | <input type="radio"/> |
